# Supplementary material
Source: PubMed Central journal article supplement (PMC7071968)
Supplement: NIHMS1544187-supplement-2.pdf [file NIHMS1544187-supplement-2.pdf]

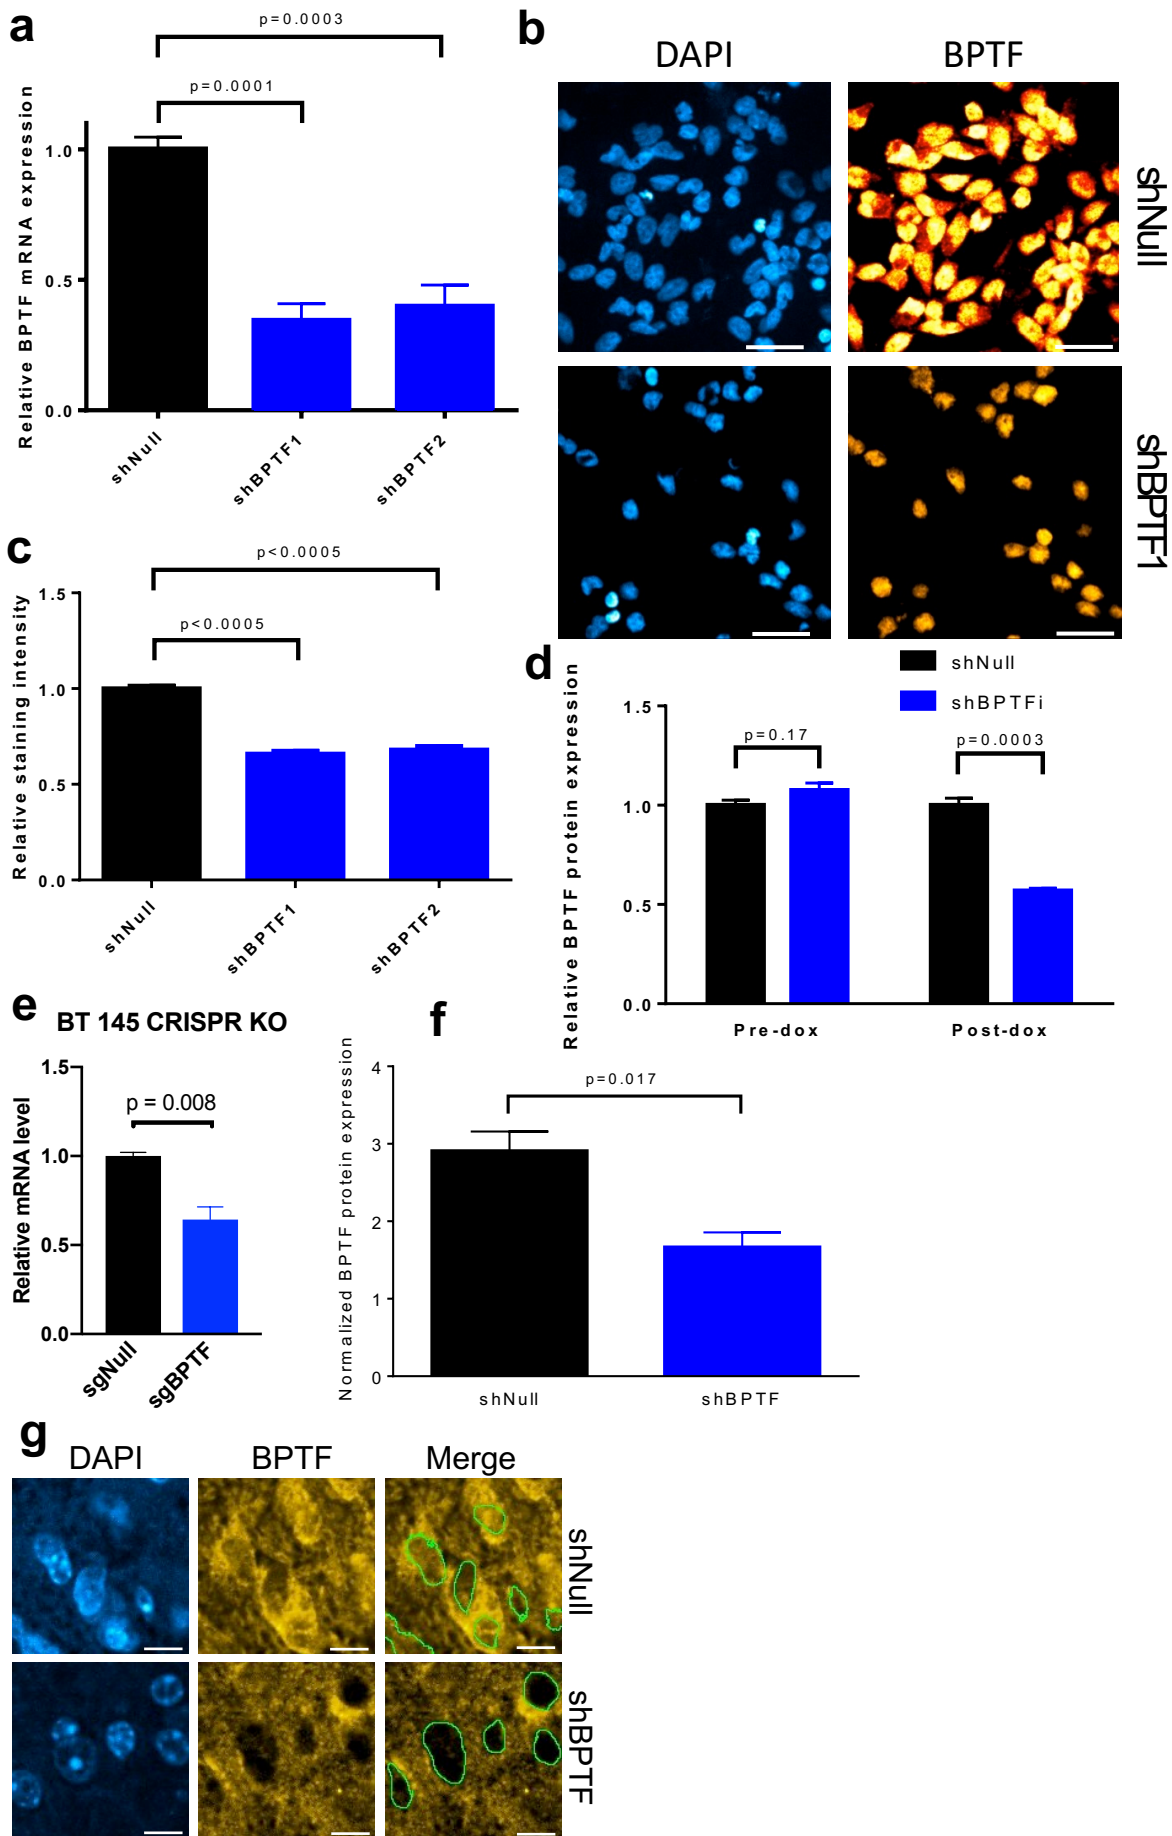

Supplemental Figure 1

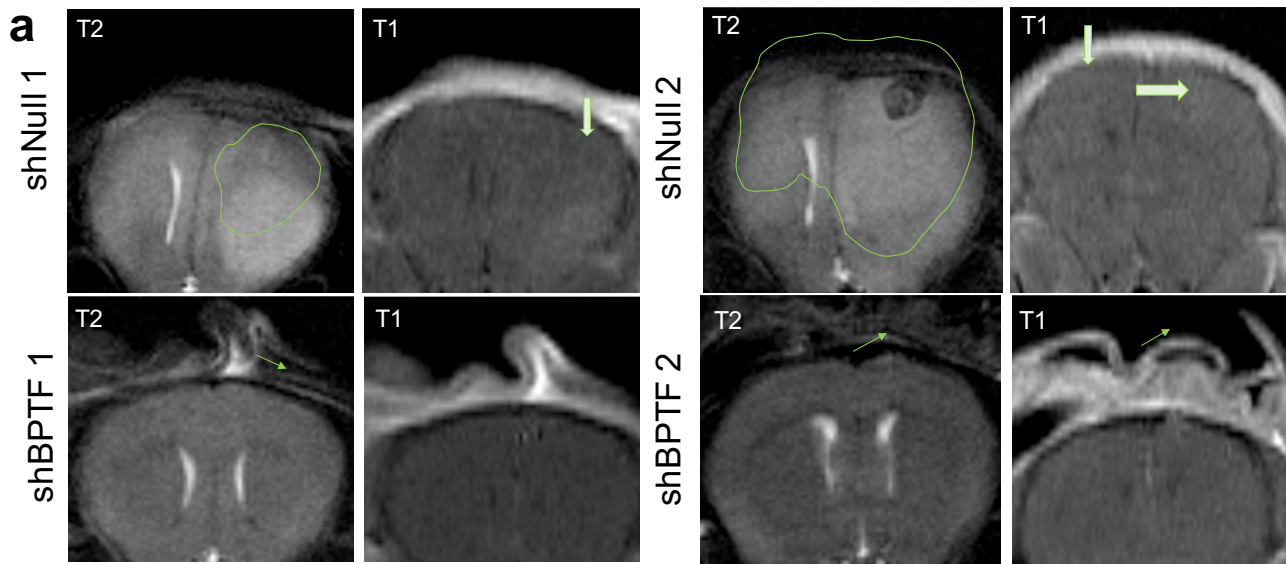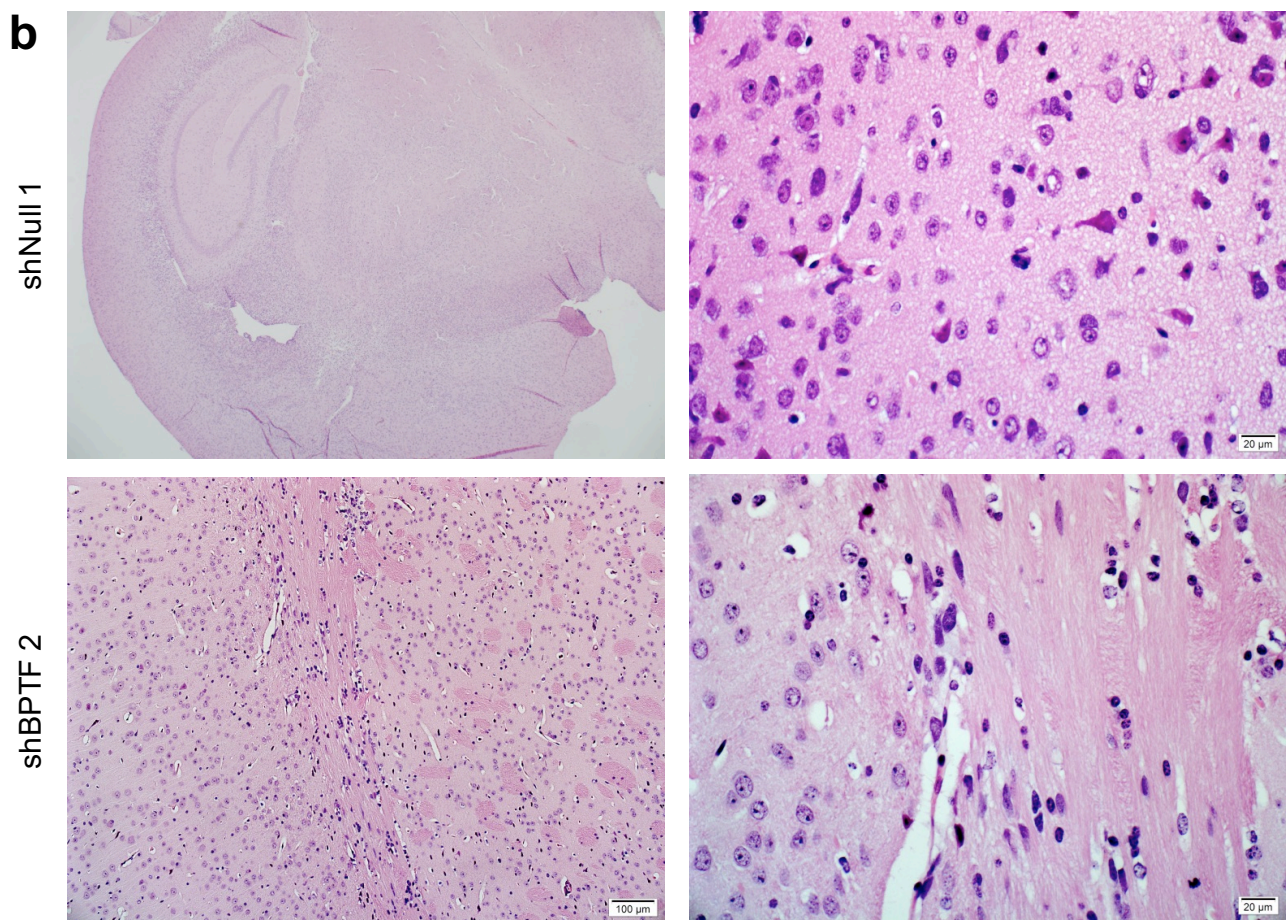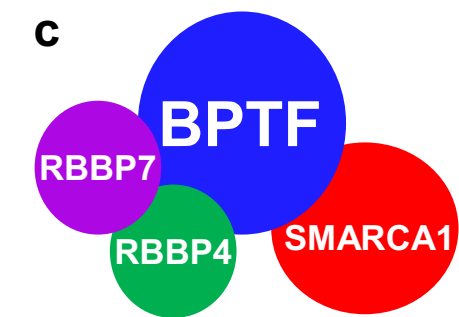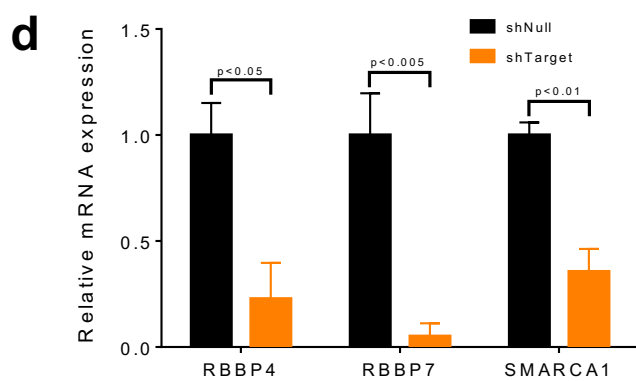

Supplemental Figure 2

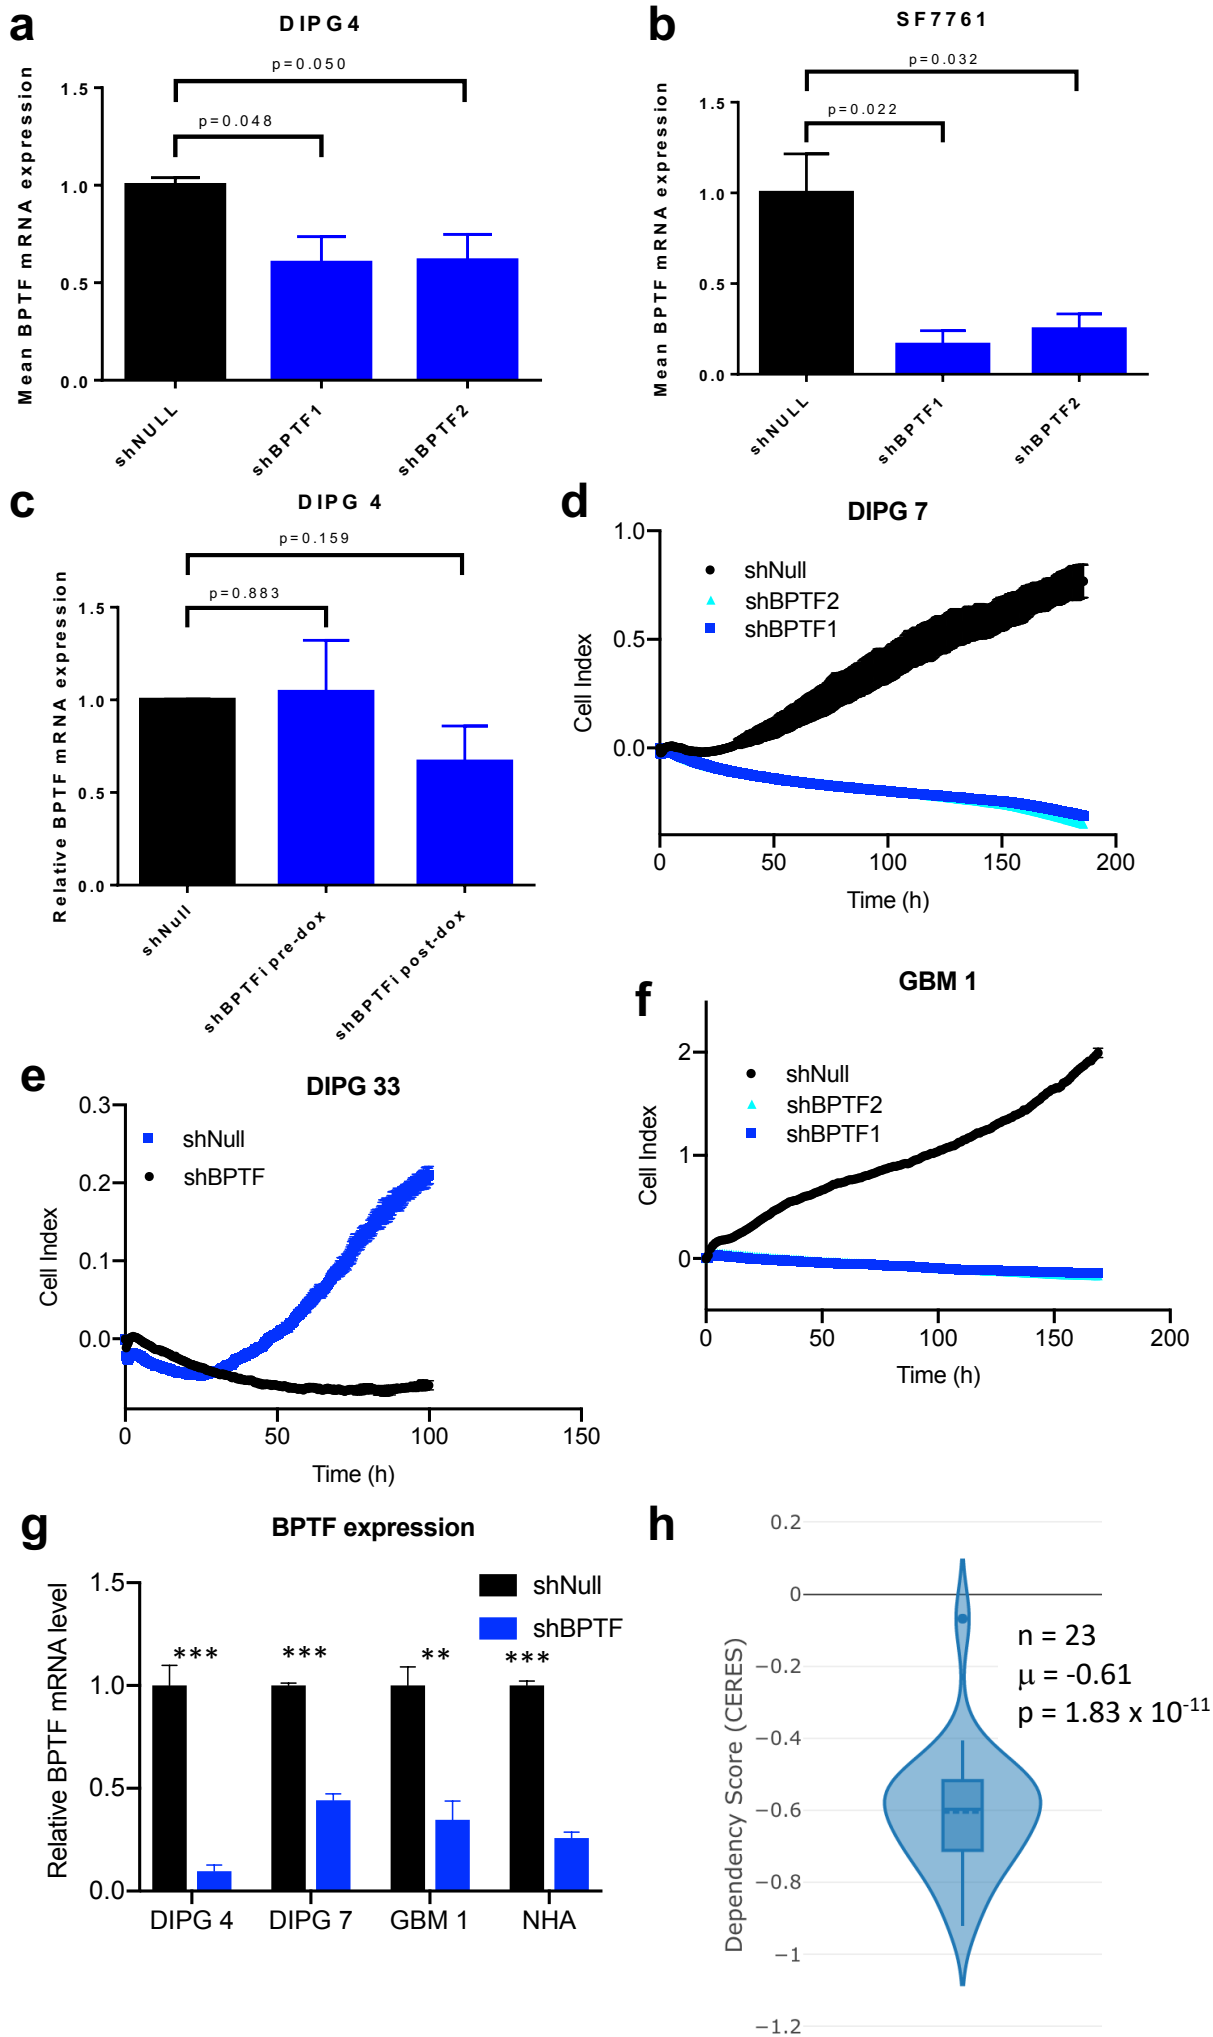

Supplemental Figure 3

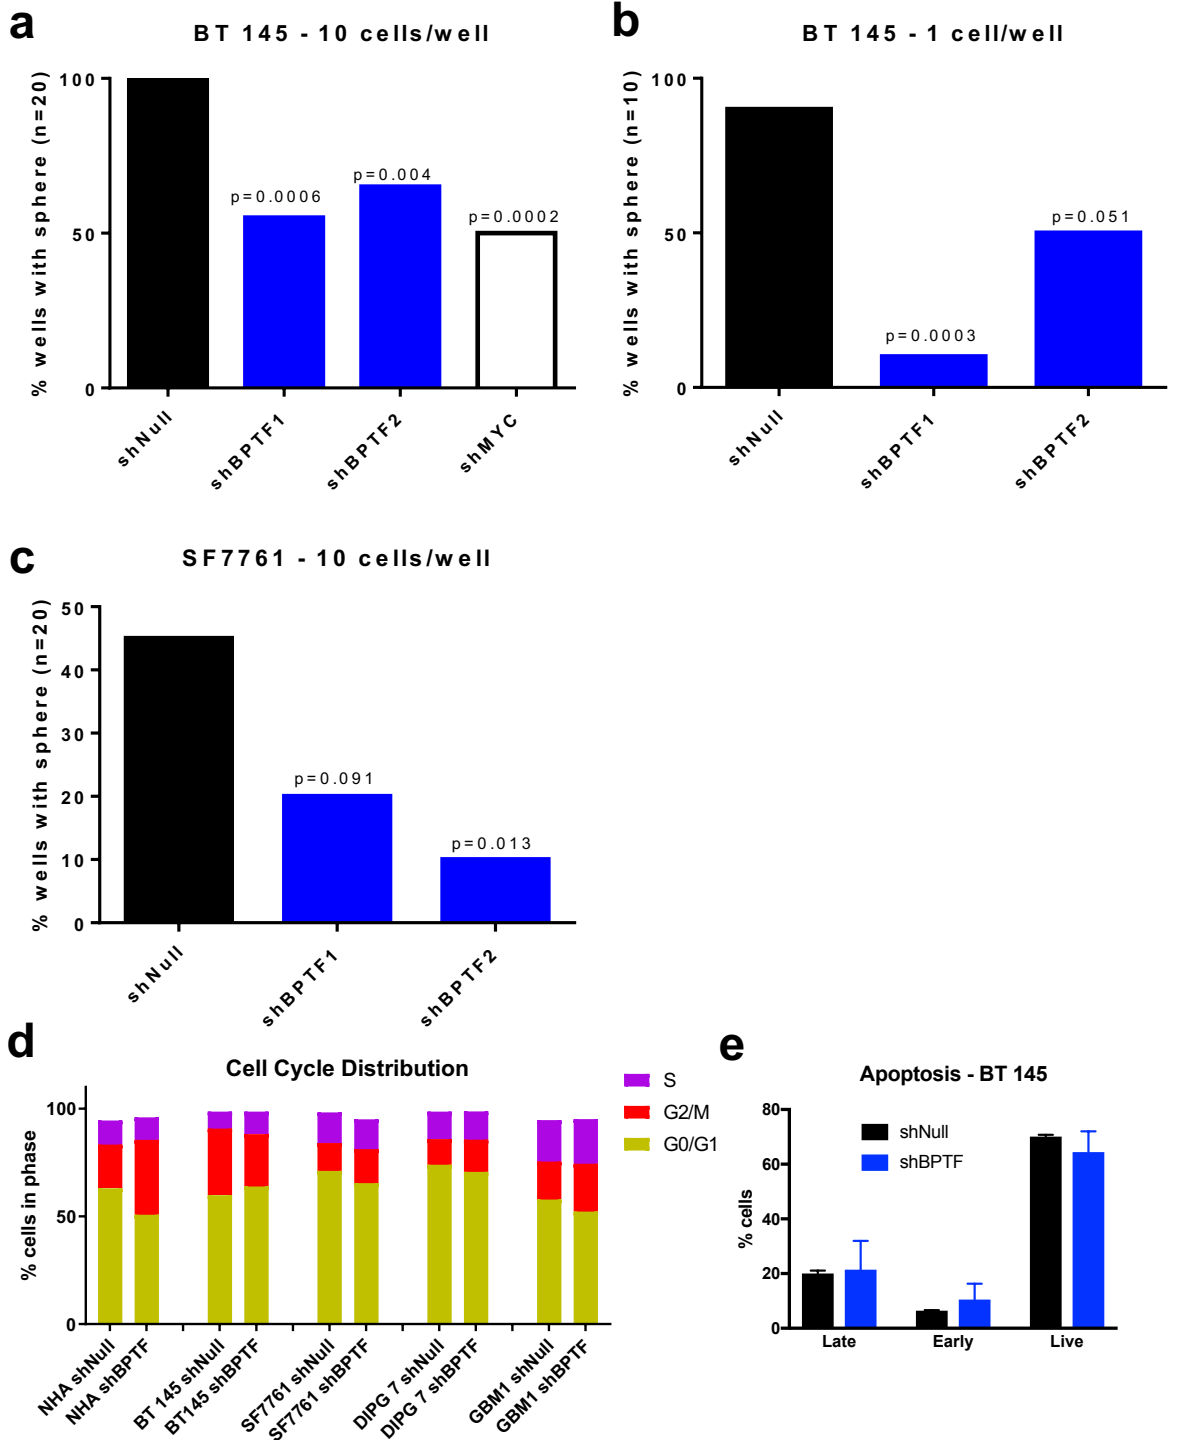

Supplemental Figure 4

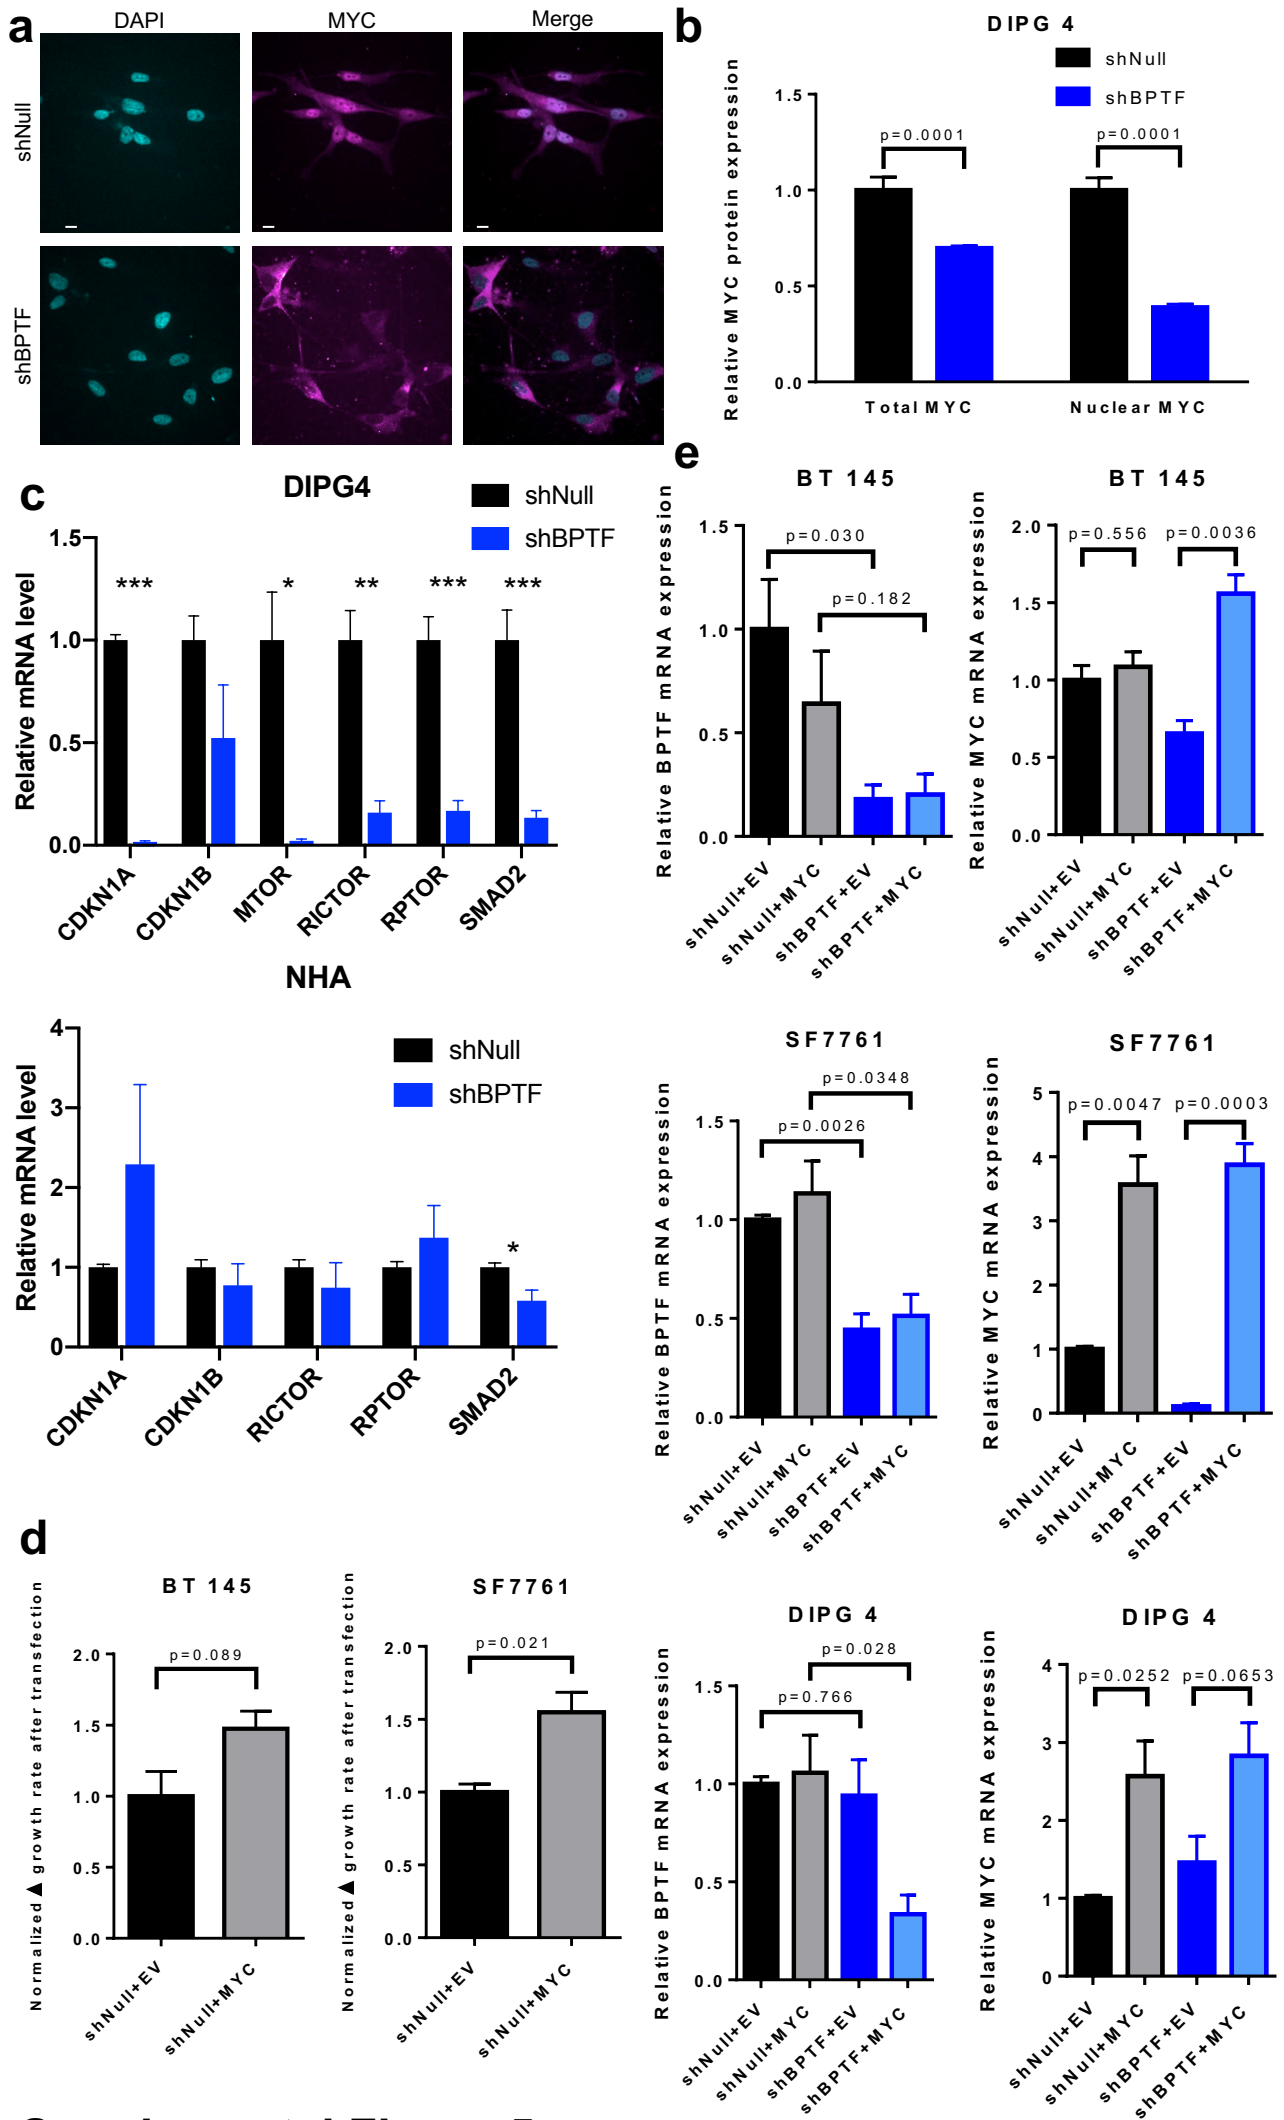

**Supplemental Figure 5**

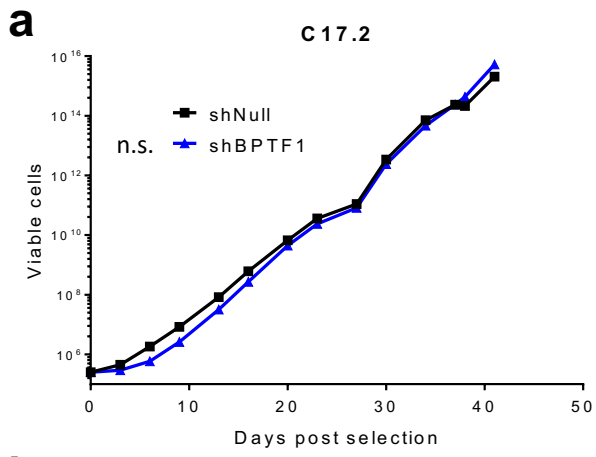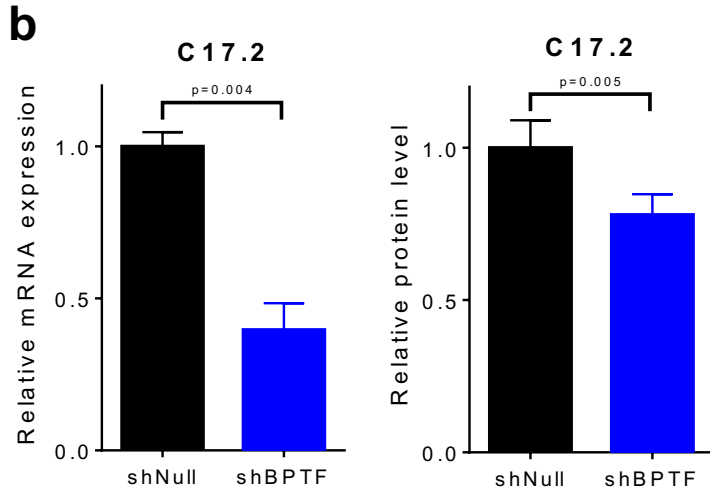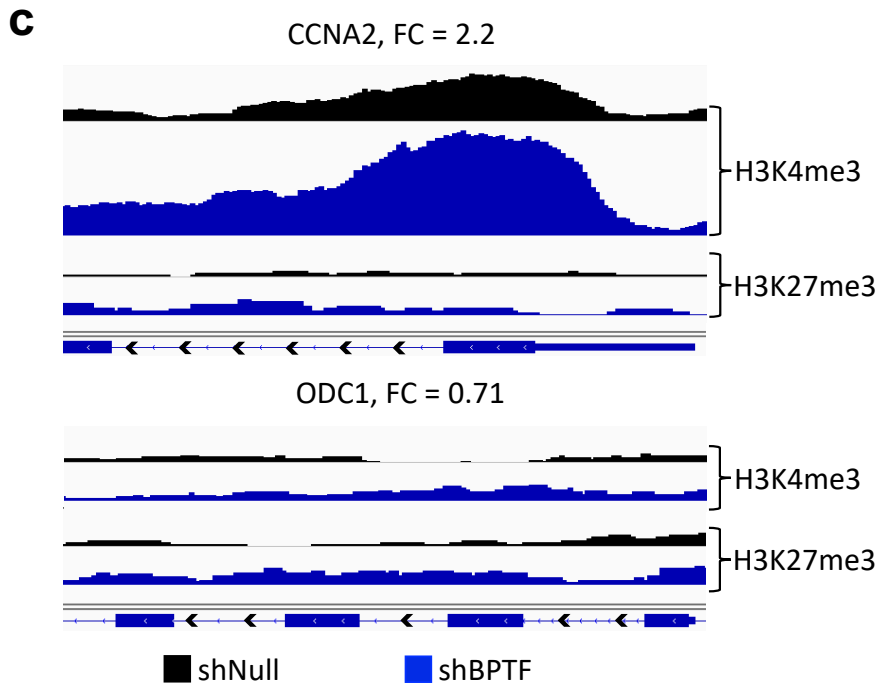

**Supplemental Figure 6**
