# Supplementary material
Source: PubMed Central journal article supplement (PMC7071968)
Supplement: NIHMS1544187-supplement-4.pdf [file NIHMS1544187-supplement-4.pdf]

Supplemental Table 1: Cell line characteristics

| Name    | Derivation          | Classification | Genetic Features                                                                              |
|---------|---------------------|----------------|-----------------------------------------------------------------------------------------------|
| BT 145  | Adult resection     | Glioblastoma   | <i>MYC</i> overexpressed, <i>CDKN2A/B</i> homozygous deletion, <i>PTEN/RB1</i> underexpressed |
| BT 159  | Adult resection     | Glioblastoma   | <i>EGFR</i> overexpressed, <i>PIK3C2B</i> overexpressed                                       |
| DIPG 4  | Pediatric autopsy   | DIPG           | <i>HIST1H3B</i> mutant, <i>ACVR1</i> mutant                                                   |
| DIPG 6  | Pediatric autopsy   | DIPG           | <i>H3F3A</i> mutant, <i>TP53</i> mutant                                                       |
| SF7761  | Pediatric biopsy    | DIPG           | <i>H3F3A</i> mutant, exogenous hTERT                                                          |
| GBM1    | Pediatric resection | Glioblastoma   | H3K27 WT                                                                                      |
| DIPG 7  | Pediatric autopsy   | DIPG           | <i>H3F3A</i> mutant, <i>ACVR1</i> mutant                                                      |
| DIPG 33 | Pediatric autopsy   | DIPG           |                                                                                               |
| T3691   | Adult resection     | Glioblastoma   |                                                                                               |
| T387    | Adult resection     | Glioblastoma   |                                                                                               |

Supplemental Table 2: Most overexpressed genesets with *BPTF* KD by GSEA

| NAME                                                     | SIZE | ES       | NES      | FDR q-val |
|----------------------------------------------------------|------|----------|----------|-----------|
| GO_CELL_MORPHOGENESIS_INVOLVED_IN_NEURON_DIFFERENTIATION | 361  | 0.415601 | 9.3597   | 0         |
| GO_NEURON_PROJECTION_MORPHOGENESIS                       | 393  | 0.400031 | 9.172595 | 0         |
| GO_REGULATION_OF_SYSTEM_PROCESS                          | 498  | 0.353762 | 8.910024 | 0         |
| GO_SKELETAL_SYSTEM_DEVELOPMENT                           | 451  | 0.344876 | 8.543805 | 0         |
| GO_TAXIS                                                 | 451  | 0.339593 | 8.357675 | 0         |
| GO_SENSORY_ORGAN_DEVELOPMENT                             | 490  | 0.316914 | 8.07137  | 0         |
| GO_SYNAPTIC_SIGNALING                                    | 417  | 0.332879 | 7.801979 | 0         |
| GO_MUSCLE_STRUCTURE_DEVELOPMENT                          | 421  | 0.320035 | 7.762128 | 0         |
| GO_EXTRACELLULAR_STRUCTURE_ORGANIZATION                  | 301  | 0.375465 | 7.641332 | 0         |
| GO_REGULATION_OF_BLOOD_CIRCULATION                       | 290  | 0.385971 | 7.564449 | 0         |
| GO_HEART_DEVELOPMENT                                     | 456  | 0.303947 | 7.553804 | 0         |
| GO_FOREBRAIN_DEVELOPMENT                                 | 354  | 0.344524 | 7.511221 | 0         |
| GO_EMBRYONIC_ORGAN_DEVELOPMENT                           | 404  | 0.326681 | 7.505429 | 0         |
| GO_EPITHELIAL_CELL_DIFFERENTIATION                       | 486  | 0.29093  | 7.401311 | 0         |
| GO_VASCULATURE_DEVELOPMENT                               | 462  | 0.303339 | 7.380436 | 0         |
| GO_CIRCULATORY_SYSTEM_PROCESS                            | 359  | 0.340834 | 7.30921  | 0         |
| GO_ANION_TRANSPORT                                       | 495  | 0.278589 | 7.214427 | 0         |
| GO_REGULATION_OF_TRANSMEMBRANE_TRANSPORT                 | 415  | 0.30337  | 7.187595 | 0         |
| GO_REGULATION_OF_NEURON_PROJECTION_DEVELOPMENT           | 398  | 0.307157 | 7.092272 | 0         |
| GO_POSITIVE_REGULATION_OF_NERVOUS_SYSTEM_DEVELOPMENT     | 418  | 0.300016 | 7.033771 | 0         |

Supplemental Table 3: Most underexpressed genesets with *BPTF* KD by GSEA

| NAME                                                                          | SIZE | ES       | NES      | FDR q-val |
|-------------------------------------------------------------------------------|------|----------|----------|-----------|
| GO_RIBONUCLEOPROTEIN_COMPLEX_BIOGENESIS                                       | 426  | -0.44033 | -10.6926 | 0         |
| GO_NCRNA_PROCESSING                                                           | 372  | -0.45012 | -9.98928 | 0         |
| GO_RIBOSOME_BIOGENESIS                                                        | 302  | -0.47571 | -9.53313 | 0         |
| GO_MRNA_PROCESSING                                                            | 418  | -0.39262 | -9.11744 | 0         |
| GO_AMIDE_BIOSYNTHETIC_PROCESS                                                 | 497  | -0.3502  | -9.09894 | 0         |
| GO_POSTTRANSCRIPTIONAL_REGULATION_OF_GENE_EXPRESSION                          | 432  | -0.37365 | -8.97247 | 0         |
| GO_RNA_SPLICING                                                               | 355  | -0.39724 | -8.68594 | 0         |
| GO_PROTEASOMAL_PROTEIN_CATABOLIC_PROCESS                                      | 266  | -0.42809 | -8.19792 | 0         |
| GO_RNA_SPLICING_VIA_TRANSESTERIFICATION_REACTIONS                             | 261  | -0.42362 | -8.08109 | 0         |
| GO_REGULATION_OF_PROTEIN_CATABOLIC_PROCESS                                    | 383  | -0.35543 | -8.0554  | 0         |
| GO_RRNA_METABOLIC_PROCESS                                                     | 251  | -0.43527 | -7.98752 | 0         |
| GO_POSITIVE_REGULATION_OF_CATABOLIC_PROCESS                                   | 389  | -0.33797 | -7.81993 | 0         |
| GO_MITOCHONDRIAL_TRANSLATION                                                  | 105  | -0.62389 | -7.55179 | 0         |
| GO_REGULATION_OF_CELLULAR_PROTEIN_CATABOLIC_PROCESS                           | 267  | -0.39145 | -7.54257 | 0         |
| GO_RESPONSE_TO_ENDOPLASMIC_RETICULUM_STRESS                                   | 227  | -0.42001 | -7.50055 | 0         |
| GO_TRNA_METABOLIC_PROCESS                                                     | 168  | -0.5021  | -7.49502 | 0         |
| GO_PROTEIN_POLYUBIQUITINATION                                                 | 238  | -0.41364 | -7.44369 | 0         |
| GO_REGULATION_OF_PROTEIN_MODIFICATION_BY_SMALL_PROTEIN_CONJUGATION_OR_REMOVAL | 274  | -0.39349 | -7.41669 | 0         |
| GO_POSITIVE_REGULATION_OF_PROTEOLYSIS                                         | 359  | -0.33297 | -7.28157 | 0         |
| GO_DNA_REPAIR                                                                 | 456  | -0.28877 | -7.19827 | 0         |
| GO_POSITIVE_REGULATION_OF_PROTEIN_CATABOLIC_PROCESS                           | 258  | -0.38321 | -7.17706 | 0         |
| GO_MACROMOLECULAR_COMPLEX_DISASSEMBLY                                         | 180  | -0.44485 | -7.06967 | 0         |

Supplemental Table 5: HDAC inhibitor dose-response results

IC<sub>50</sub> (nM) (95% CI)

|                   | <b>BT 145</b>    |                  | <b>DIPG 4</b>   |                  |
|-------------------|------------------|------------------|-----------------|------------------|
|                   | <b>shNull</b>    | <b>shBPTF</b>    | <b>shNull</b>   | <b>shBPTF</b>    |
| <b>Apicidin</b>   | 833.3 (485-1431) | 255.3 (186-351)  | 77.18 (72-83)   | 39.68 (35-45)    |
| <b>Oxamflatin</b> | 2348 (1940-2483) | 892.4 (524-1520) | 638.1 (460-885) | 226.9 (149-345)  |
| <b>SAHA</b>       | 1646 (1238-2188) | 956.9 (625-1464) | 1142 (973-1341) | 966.7 (833-1122) |
