# Supplementary material
Source: PubMed Central journal article supplement (PMC7071968)
Supplement: NIHMS1544187-supplement-5.pdf [file NIHMS1544187-supplement-5.pdf]

Supplemental Table 4

| HALLMARK_MYC_v1 |            | ChIP-Seq BPTF KD |         | RNA-Seq    |            | FC     |        | Mean Peak  |            | Peak Score |       |
|-----------------|------------|------------------|---------|------------|------------|--------|--------|------------|------------|------------|-------|
| Gene            | Peak Score | p-value          | PROBE   | RANK       | FC         |        |        |            |            | +Rank      | -Rank |
| CCNA2           | 53.6       | 4.13E-08         | CCNA2   | 1.13594913 | 2.19763095 |        |        |            |            |            |       |
|                 |            |                  | CDC45   | 1.04989457 |            | +Rank  | 21/61  | 0.3442623  | 67.9761905 |            |       |
|                 |            |                  | MCM4    | 0.84706175 |            | -Rank  | 39/135 | 0.28888889 | 50.0417949 | 53.6       | 88.7  |
|                 |            |                  | MCM7    | 0.8026979  |            | Pvalue |        | 0.435      | 0.04640718 | 46.8       | 27.9  |
|                 |            |                  | CDC20   | 0.70235926 |            |        |        |            |            | 186.5      | 96.2  |
|                 |            |                  | MAD2L1  | 0.6939823  |            |        |        |            |            | 60.9       | 38.7  |
|                 |            |                  | PABPC1  | 0.61202651 |            |        |        |            |            | 59.8       | 89.7  |
| DUT             | 46.8       | 0.0000025        | DUT     | 0.56986207 |            |        |        |            |            | 135.8      | 68.6  |
|                 |            |                  | RRM1    | 0.55425137 |            |        |        |            |            | 91.2       | 84.5  |
|                 |            |                  | MCM6    | 0.4444851  |            |        |        |            |            | 90.9       | 24.3  |
|                 |            |                  | CDK2    | 0.4363606  |            |        |        |            |            | 39         | 43.9  |
| MYC             | 186.5      | 1.05E-12         | MYC     | 0.4275324  |            |        |        |            |            | 62.4       | 95.5  |
|                 |            |                  | MCM2    | 0.41710082 |            |        |        |            |            | 76.2       | 46.8  |
|                 |            |                  | VDAC3   | 0.37145448 |            |        |        |            |            | 40         | 48.2  |
|                 |            |                  | MCM5    | 0.34109658 |            |        |        |            |            | 71.9       | 48.5  |
| LDHA            | 60.9       | 4.22E-09         | LDHA    | 0.32457352 |            |        |        |            |            | 117.2      | 93.8  |
|                 |            |                  | TYMS    | 0.30816263 |            |        |        |            |            | 17.9       | 31.5  |
| RFC4            | 59.8       | 1.15E-09         | RFC4    | 0.28386292 |            |        |        |            |            | 27.7       | 60.1  |
| HNRNPA1         | 135.8      | 7.48E-12         | HNRNPA1 | 0.27956542 |            |        |        |            |            | 64.1       | 37.9  |
| PABPC4          | 91.2       | 1.43E-08         | PABPC4  | 0.27510047 |            |        |        |            |            | 12.8       | 29.1  |
| SNRPA1          | 90.9       | 1.17E-16         | SNRPA   | 0.22105275 |            |        |        |            |            | 35         | 8.23  |
|                 |            |                  | RPL34   | 0.18047656 |            |        |        |            |            | 81.8       | 53.6  |
|                 |            |                  | AP3S1   | 0.17563787 |            |        |        |            |            | 56         | 122.1 |
|                 |            |                  | SRPK1   | 0.17147334 |            |        |        |            |            |            | 44.4  |
|                 |            |                  | SNRPD2  | 0.1631663  |            |        |        |            |            |            | 61.6  |
|                 |            |                  | PRDX4   | 0.15688805 |            |        |        |            |            |            | 44.9  |
|                 |            |                  | DEK     | 0.15274364 |            |        |        |            |            |            | 60.2  |
|                 |            |                  | RANBP1  | 0.14393207 |            |        |        |            |            |            | 32    |
|                 |            |                  | YWHAQ   | 0.14253302 |            |        |        |            |            |            | 25.1  |
|                 |            |                  | RPL18   | 0.12721799 |            |        |        |            |            |            | 48.7  |
| HNRNPD          | 39         | 3.86E-07         | HNRNPD  | 0.12613891 |            |        |        |            |            |            | 44.9  |
|                 |            |                  | POLD2   | 0.12338629 |            |        |        |            |            |            | 33.7  |
| HDGF            | 62.4       | 1.26E-07         | HDGF    | 0.12162779 |            |        |        |            |            |            | 36.7  |
| NAP1L1          | 76.2       | 2.42E-08         | NAP1L1  | 0.12045762 |            |        |        |            |            |            | 20.6  |
|                 |            |                  | SRSF2   | 0.11958491 |            |        |        |            |            |            | 17    |
| H2AFZ           | 40         | 6.95E-08         | H2AFZ   | 0.11903436 |            |        |        |            |            |            | 10.4  |
|                 |            |                  | ORC2    | 0.11763565 |            |        |        |            |            |            | 35.4  |
| RPL14           | 71.9       | 9.88E-19         | RPL14   | 0.10884498 |            |        |        |            |            |            | 18.1  |
|                 |            |                  | PGK1    | 0.10661292 |            |        |        |            |            |            | 90.7  |
| USP1            | 117.2      | 0.00000568       | USP1    | 0.1039498  |            |        |        |            |            |            | 44.9  |
| TFDP1           | 17.9       | 2.17E-11         | TFDP1   | 0.0976626  |            |        |        |            |            |            | 44.5  |
| KPNA2           | 27.7       | 2.07E-07         | KPNA2   | 0.09330864 |            |        |        |            |            |            |       |
|                 |            |                  | RPS3    | 0.08022591 |            |        |        |            |            |            |       |
|                 |            |                  | COX5A   | 0.05995645 |            |        |        |            |            |            |       |
|                 |            |                  | PRPS2   | 0.05895418 |            |        |        |            |            |            |       |
| COPS5           | 64.1       | 4.87E-17         | COPS5   | 0.05301309 |            |        |        |            |            |            |       |
|                 |            |                  | HPRT1   | 0.05241556 |            |        |        |            |            |            |       |
|                 |            |                  | PPIA    | 0.04764105 |            |        |        |            |            |            |       |
|                 |            |                  | SNRPD3  | 0.04690128 |            |        |        |            |            |            |       |
| ACP1            | 12.8       | 6.85E-08         | ACP1    | 0.04552533 |            |        |        |            |            |            |       |
|                 |            |                  | RPS5    | 0.04197728 |            |        |        |            |            |            |       |
|                 |            |                  | UBA2    | 0.0370063  |            |        |        |            |            |            |       |
|                 |            |                  | SRSF1   | 0.02396326 |            |        |        |            |            |            |       |
|                 |            |                  | PA2G4   | 0.02268608 |            |        |        |            |            |            |       |
| RPS6            | 35         | 8.17E-11         | RPS6    | 0.01781209 |            |        |        |            |            |            |       |
|                 |            |                  | PCNA    | 0.01597349 |            |        |        |            |            |            |       |
| RPLP0           | 81.8       | 1.39E-10         | RPLP0   | 0.01298245 |            |        |        |            |            |            |       |
|                 |            |                  | DHX15   | 0.01241727 |            |        |        |            |            |            |       |
|                 |            |                  | CDK4    | 0.00915277 |            |        |        |            |            |            |       |
|                 |            |                  | RUVBL2  | 0.00913041 |            |        |        |            |            |            |       |
| GOT2            | 56         | 2.11E-08         | GOT2    | 0.00673149 |            |        |        |            |            |            |       |
| FBL             | 80.6       | 0.00000203       | FBL     | 0          |            |        |        |            |            |            |       |
|                 |            |                  | LSM2    | 0          |            |        |        |            |            |            |       |
|                 |            |                  | PRPF31  | 0          |            |        |        |            |            |            |       |
| SMARCC1         | 88.7       | 0.0000105        | SMARCC1 | -0.0017212 |            |        |        |            |            |            |       |
|                 |            |                  | RPL6    | -0.0056502 |            |        |        |            |            |            |       |
| SRSF7           | 27.9       | 1.49E-10         | SRSF7   | -0.0156544 |            |        |        |            |            |            |       |
|                 |            |                  | STARD7  | -0.0194748 |            |        |        |            |            |            |       |
|                 |            |                  | CLNS1A  | -0.021473  |            |        |        |            |            |            |       |
| CNBP            | 96.2       | 0.00000578       | CNBP    | -0.0264744 |            |        |        |            |            |            |       |
| PSMD8           | 38.7       | 0.00000215       | PSMD8   | -0.0311771 |            |        |        |            |            |            |       |
|                 |            |                  | BUB3    | -0.0329336 |            |        |        |            |            |            |       |
|                 |            |                  | EIF4H   | -0.0351109 |            |        |        |            |            |            |       |
|                 |            |                  | CAD     | -0.0359716 |            |        |        |            |            |            |       |
|                 |            |                  | LSM7    | -0.0414354 |            |        |        |            |            |            |       |
|                 |            |                  | EXOSC7  | -0.0415205 |            |        |        |            |            |            |       |
| RPS2            | 89.7       | 0.00000107       | RPS2    | -0.0441118 |            |        |        |            |            |            |       |
| TRIM28          | 68.6       | 1.48E-16         | TRIM28  | -0.0460146 |            |        |        |            |            |            |       |

Supplemental Table 4

|         |       |            |           |            |
|---------|-------|------------|-----------|------------|
|         |       |            | XPO1      | -0.0537283 |
|         |       |            | HNRNPC    | -0.057037  |
|         |       |            | RPL22     | -0.0606161 |
|         |       |            | ILF2      | -0.0623962 |
| CYC1    | 84.5  | 1.96E-09   | CYC1      | -0.0651279 |
|         |       |            | POLE3     | -0.0668032 |
|         |       |            | EPRS      | -0.0794249 |
|         |       |            | SNRPA1    | -0.0805762 |
|         |       |            | PHB2      | -0.0814029 |
|         |       |            | HNRNPR    | -0.083235  |
|         |       |            | SNRPG     | -0.0857138 |
|         |       |            | SERBP1    | -0.0942583 |
|         |       |            | EEF1B2    | -0.094447  |
|         |       |            | NCBP1     | -0.1076343 |
|         |       |            | HDAC2     | -0.109014  |
| EIF3D   | 24.3  | 7.31E-07   | EIF3B     | -0.1172389 |
|         |       |            | GLO1      | -0.1218975 |
|         |       |            | ERH       | -0.1238461 |
|         |       |            | PSMA2     | -0.124302  |
|         |       |            | UBE2E1    | -0.125047  |
|         |       |            | TRA2B     | -0.130971  |
| PPM1G   | 43.9  | 1.52E-13   | PPM1G     | -0.1317578 |
| SLC25A3 | 95.5  | 1.56E-17   | SLC25A3   | -0.1399482 |
| GNL3    | 46.8  | 6.94E-10   | GNL3      | -0.141168  |
| TXNL4A  | 48.2  | 0.0000024  | TXNL4A    | -0.1424245 |
|         |       |            | CBX3      | -0.1452409 |
|         |       |            | SRSF3     | -0.1593473 |
|         |       |            | FAM120A   | -0.1598155 |
|         |       |            | KPNB1     | -0.1616983 |
|         |       |            | TOMM70A   | -0.1655997 |
| PSMB2   | 48.5  | 5.75E-15   | PSMB2     | -0.1681342 |
|         |       |            | PWP1      | -0.1708198 |
|         |       |            | HNRNPU    | -0.171547  |
|         |       |            | RNPS1     | -0.1721623 |
|         |       |            | GNB2L1    | -0.1750601 |
| PCBP1   | 93.8  | 1.93E-10   | PCBP1     | -0.182584  |
| RPS10   | 31.5  | 1.45E-13   | RPS10     | -0.1833825 |
|         |       |            | RAN       | -0.1885345 |
| EIF4E   | 60.1  | 0.0000119  | EIF4E     | -0.1902455 |
|         |       |            | G3BP1     | -0.1951841 |
|         |       |            | GSPT1     | -0.1988791 |
|         |       |            | VDAC1     | -0.1993036 |
|         |       |            | YWHAE     | -0.1994358 |
| CCT2    | 37.9  | 0.00000381 | CCT2      | -0.1999037 |
| PSMA6   | 29.1  | 2.34E-07   | PSMA6     | -0.2002418 |
|         |       |            | SSBP1     | -0.2003084 |
|         |       |            | HNRNPA3   | -0.2010404 |
|         |       |            | CUL1      | -0.2041366 |
|         |       |            | SNRPD1    | -0.2045245 |
|         |       |            | SF3B3     | -0.211418  |
|         |       |            | SF3A1     | -0.2129027 |
|         |       |            | TARDBP    | -0.2132328 |
|         |       |            | PSMD14    | -0.2325552 |
|         |       |            | RAD23B    | -0.2335004 |
|         |       |            | HNRNPA2B1 | -0.2360176 |
|         |       |            | SET       | -0.2410317 |
|         |       |            | VBP1      | -0.2484407 |
| NHP2    | 8.23  | 1.88E-07   | NHP2      | -0.2533319 |
|         |       |            | PSMA4     | -0.2543971 |
| PSMD1   | 53.6  | 0.00000133 | PSMD1     | -0.2588566 |
|         |       |            | PTGES3    | -0.2600884 |
|         |       |            | XRCC6     | -0.2618956 |
| NCBP2   | 122.1 | 3.23E-10   | NCBP2     | -0.2711303 |
|         |       |            | PSMC6     | -0.2740873 |
|         |       |            | EIF3D     | -0.2753575 |
|         |       |            | PSMC4     | -0.2824223 |
|         |       |            | ABCE1     | -0.2838093 |
|         |       |            | SYNCRIP   | -0.2855321 |
| NDUFAB1 | 44.4  | 0.00000107 | NDUFAB1   | -0.2895584 |
| RSL1D1  | 61.6  | 3.45E-08   | RSL1D1    | -0.2902323 |
|         |       |            | PSMB3     | -0.2904546 |
|         |       |            | UBE2L3    | -0.2907846 |
|         |       |            | TUFM      | -0.2942884 |
| EIF2S2  | 44.9  | 3.22E-07   | EIF2S2    | -0.298433  |
|         |       |            | EIF1AX    | -0.2987397 |
|         |       |            | NPM1      | -0.3119431 |
| SSB     | 60.2  | 1.12E-10   | SSB       | -0.3131584 |
|         |       |            | XPOT      | -0.3214027 |
|         |       |            | EIF4A1    | -0.3226993 |
|         |       |            | NOP56     | -0.3378809 |
|         |       |            | IFRD1     | -0.3382326 |

Supplemental Table 4

|          |      |            |          |            |           |
|----------|------|------------|----------|------------|-----------|
| NME1     | 32   | 4.32E-07   | NME1     | -0.3416119 |           |
|          |      |            | EIF2S1   | -0.3444484 |           |
| PRDX3    | 25.1 | 0.00000239 | PRDX3    | -0.3471419 |           |
| DDX18    | 48.7 | 7.96E-12   | DDX18    | -0.3482528 |           |
|          |      |            | C1QBP    | -0.3581174 |           |
|          |      |            | MRPL23   | -0.3645431 |           |
| EIF4G2   | 44.9 | 1.73E-12   | EIF4G2   | -0.3699948 |           |
|          |      |            | NOLC1    | -0.3739274 |           |
|          |      |            | NOP16    | -0.3746264 |           |
| CCT4     | 33.7 | 2.94E-11   | CCT4     | -0.3846242 |           |
|          |      |            | PHB      | -0.3943042 |           |
|          |      |            | CCT5     | -0.3977252 |           |
| TCP1     | 36.7 | 0.00000104 | TCP1     | -0.3992713 |           |
|          |      |            | CCT7     | -0.4001908 |           |
| EIF3J    | 20.6 | 8.06E-12   | EIF3J    | -0.4116817 |           |
|          |      |            | IARS     | -0.4173661 |           |
|          |      |            | APEX1    | -0.4211169 |           |
|          |      |            | AIMP2    | -0.4237867 |           |
| IMPDH2   | 17   | 0.00000077 | IMPDH2   | -0.4248542 |           |
|          |      |            | MRPL9    | -0.4268897 |           |
|          |      |            | PSMD7    | -0.430424  |           |
|          |      |            | PSMD3    | -0.4323525 |           |
| U2AF1    | 10.4 | 3.05E-07   | U2AF1    | -0.4386081 |           |
|          |      |            | SNRPB2   | -0.4486603 |           |
| ETF1     | 35.4 | 9.88E-10   | ETF1     | -0.4490557 |           |
|          |      |            | CCT3     | -0.4518921 |           |
|          |      |            | DDX21    | -0.4714932 |           |
|          |      |            | SRM      | -0.4790887 |           |
|          |      |            | CSTF2    | -0.4801816 |           |
|          |      |            | HDHC2    | -0.4873484 |           |
| ODC1     | 18.1 | 0.00000107 | ODC1     | -0.4931192 | 0.7104873 |
|          |      |            | KARS     | -0.49468   |           |
|          |      |            | MRPS18B  | -0.498426  |           |
| HSPD1    | 90.7 | 1.15E-09   | HSPD1    | -0.5235918 |           |
|          |      |            | RRP9     | -0.551995  |           |
|          |      |            | HSPE1    | -0.5586786 |           |
| CANX     | 44.9 | 0.00000107 | CANX     | -0.5811315 |           |
| HSP90AB1 | 44.5 | 6.67E-07   | HSP90AB1 | -0.6161804 |           |
|          |      |            | PSMA7    | -0.6167394 |           |
|          |      |            | PSMA1    | -1.1812806 |           |

Supplemental Table 4

| BILD_ONCOGENIC |                        |            | RNA-Seq   |            | Mean peak |           | Peak Score  |            |
|----------------|------------------------|------------|-----------|------------|-----------|-----------|-------------|------------|
| GENE           | ChIP-Seq<br>Peak score | p-value    | GENE      | RANK       | +Rank     | -Rank     | +Rank       | -Rank      |
|                |                        |            | SLC6A15   | 16.6388397 | 18/80     | 0.225     | 58.56111111 |            |
|                |                        |            | SLITRK6   | 5.06337881 | 33/111    | 0.2972973 | 40.1969697  | 23.6 74.7  |
|                |                        |            | LINC00173 | 4.86524773 |           | 0.267     | 0.04184993  | 66 34.6    |
|                |                        |            | TGM2      | 3.3055625  |           |           |             | 20.3 24.2  |
|                |                        |            | SLC29A2   | 2.86925888 |           |           |             | 38.9 68.6  |
|                |                        |            | COL8A2    | 2.7106967  |           |           |             | 113.8 14.1 |
|                |                        |            | DAB2      | 2.58675242 |           |           |             | 66.8 19.2  |
|                |                        |            | ALS2CL    | 2.05520964 |           |           |             | 53.3 31.4  |
|                |                        |            | ATP2B4    | 1.30084837 |           |           |             | 34.3 10.1  |
|                |                        |            | WSB1      | 1.24864662 |           |           |             | 186.5 46.8 |
|                |                        |            | TNFAIP2   | 1.13008118 |           |           |             | 26.6 79.4  |
|                |                        |            | SLC12A8   | 1.11404872 |           |           |             | 85.1 16.3  |
|                |                        |            | PLAU      | 1.1053251  |           |           |             | 25.5 26.8  |
| SORL1          | 23.6                   | 1.56E-07   | SORL1     | 1.09966004 |           |           |             | 83.8 19.9  |
|                |                        |            | CDCA8     | 1.06797743 |           |           |             | 64.7 18.4  |
| AHNAK          | 66                     | 2.64E-11   | AHNAK     | 1.05674517 |           |           |             | 53.7 37.9  |
|                |                        |            | FGD6      | 1.05008268 |           |           |             | 47.1 64.5  |
|                |                        |            | FGF11     | 1.03772342 |           |           |             | 39.9 67.4  |
|                |                        |            | FCHSD1    | 1.01878095 |           |           |             | 24.2 11.7  |
|                |                        |            | NRP1      | 0.95035273 |           |           |             | 73.3       |
|                |                        |            | VAMP1     | 0.93542165 |           |           |             | 39.6       |
| SSH3           | 20.3                   | 1.33E-08   | SSH3      | 0.86606306 |           |           |             | 53.4       |
|                |                        |            | HK2       | 0.78860056 |           |           |             | 34.6       |
|                |                        |            | COL5A1    | 0.77164447 |           |           |             | 48.7       |
|                |                        |            | MTMR11    | 0.73122084 |           |           |             | 41.2       |
|                |                        |            | MAP3K6    | 0.69213009 |           |           |             | 22.9       |
|                |                        |            | NTF4      | 0.6744684  |           |           |             | 47.4       |
| MICAL1         | 38.9                   | 3.33E-11   | MICAL1    | 0.65618068 |           |           |             | 90.7       |
|                |                        |            | NLRP1     | 0.65596134 |           |           |             | 38.5       |
| KCNQ5          | 113.8                  | 8.54E-08   | KCNQ5     | 0.61472321 |           |           |             | 56.6       |
|                |                        |            | FAM193B   | 0.58859223 |           |           |             | 14.4       |
|                |                        |            | ARNTL     | 0.57470107 |           |           |             | 30         |
|                |                        |            | EPS8L1    | 0.53167611 |           |           |             | 18.4       |
|                |                        |            | MEG3      | 0.52434456 |           |           |             | 50.8       |
| ARNTL2         | 66.8                   | 2.68E-07   | ARNTL2    | 0.52311599 |           |           |             |            |
| ANGEL1         | 53.3                   | 0.0000117  | ANGEL1    | 0.49725965 |           |           |             |            |
| PLEC           | 34.3                   | 2.78E-11   | PLEC      | 0.47608498 |           |           |             |            |
|                |                        |            | CCNG2     | 0.466353   |           |           |             |            |
|                |                        |            | C19orf48  | 0.45999396 |           |           |             |            |
|                |                        |            | ZNF667    | 0.43643987 |           |           |             |            |
|                |                        |            | CDK2      | 0.4363606  |           |           |             |            |
| MYC            | 186.5                  | 1.05E-12   | MYC       | 0.42753241 |           |           |             |            |
| RHBDF1         | 26.6                   | 0.0000907  | RHBDF1    | 0.41274482 |           |           |             |            |
|                |                        |            | CGN       | 0.36951694 |           |           |             |            |
|                |                        |            | PDLIM7    | 0.3472614  |           |           |             |            |
|                |                        |            | EMP1      | 0.32912597 |           |           |             |            |
|                |                        |            | AGPAT5    | 0.31076297 |           |           |             |            |
|                |                        |            | DHRS1     | 0.30217695 |           |           |             |            |
| ABL2           | 85.1                   | 2.4E-10    | ABCC3     | 0.27919    |           |           |             |            |
| DUSP22         | 25.5                   | 7.2E-09    | DUSP22    | 0.27645189 |           |           |             |            |
|                |                        |            | MCOLN2    | 0.27096403 |           |           |             |            |
|                |                        |            | CCDC78    | 0.26079226 |           |           |             |            |
|                |                        |            | YPEL3     | 0.24371126 |           |           |             |            |
|                |                        |            | EXOSC5    | 0.24304299 |           |           |             |            |
| STMN3          | 83.8                   | 9.63E-07   | STMN3     | 0.21824126 |           |           |             |            |
|                |                        |            | ADAMTS15  | 0.21403849 |           |           |             |            |
| PLEKHG2        | 64.7                   | 8.15E-11   | PLEKHG2   | 0.19187275 |           |           |             |            |
|                |                        |            | TAF4B     | 0.18160665 |           |           |             |            |
| FAM168A        | 53.7                   | 1.61E-10   | FAM168A   | 0.15043417 |           |           |             |            |
|                |                        |            | ERCC1     | 0.12769637 |           |           |             |            |
| CFLAR          | 47.1                   | 0.0000343  | CFLAR     | 0.1218105  |           |           |             |            |
|                |                        |            | TINF2     | 0.11947263 |           |           |             |            |
|                |                        |            | GPD1L     | 0.10917911 |           |           |             |            |
|                |                        |            | TUBA1A    | 0.10295656 |           |           |             |            |
|                |                        |            | BCS1L     | 0.10074128 |           |           |             |            |
|                |                        |            | SESTD1    | 0.0921944  |           |           |             |            |
| PFKM           | 39.9                   | 0.00000058 | PFKM      | 0.07991305 |           |           |             |            |
| SMTN           | 24.2                   | 1.84E-11   | SMTN      | 0.07810169 |           |           |             |            |
|                |                        |            | SORD      | 0.07479279 |           |           |             |            |
|                |                        |            | DDX26B    | 0.07002355 |           |           |             |            |
|                |                        |            | SPTAN1    | 0.05750421 |           |           |             |            |
|                |                        |            | TGM1      | 0.04150365 |           |           |             |            |
|                |                        |            | KHNYN     | 0.04003356 |           |           |             |            |
|                |                        |            | PA2G4     | 0.02268608 |           |           |             |            |
|                |                        |            | DKC1      | 0.02049661 |           |           |             |            |
|                |                        |            | CDK4      | 0.00915277 |           |           |             |            |
|                |                        |            | PDP1      | 0.00793061 |           |           |             |            |
|                |                        |            | COL1A1    | 0.00572022 |           |           |             |            |

Supplemental Table 4

|           |      |            |            |            |
|-----------|------|------------|------------|------------|
|           |      |            | UBE2D4     | 0.00446694 |
|           |      |            | DDAH2      | 0          |
|           |      |            | FGFBP1     | 0          |
|           |      |            | HS6ST2     | 0          |
| MIR21     | 17.3 | 0.0000119  | MIR21      | 0          |
|           |      |            | NDE1       | 0          |
|           |      |            | OR2A4      | 0          |
|           |      |            | PAICS      | 0          |
|           |      |            | FAM195A    | -0.0029513 |
| FARSB     | 74.7 | 2.03E-07   | FARSB      | -0.0112849 |
|           |      |            | FARSA      | -0.0150817 |
|           |      |            | BOP1       | -0.0332269 |
|           |      |            | IMP4       | -0.050554  |
|           |      |            | ECE2       | -0.0517363 |
| DCAF4     | 34.6 | 2.22E-10   | DCAF4      | -0.0522741 |
|           |      |            | NIT1       | -0.0606968 |
| ERBB3     | 24.2 | 0.00000107 | ERBB3      | -0.0606983 |
|           |      |            | WDR12      | -0.0682338 |
|           |      |            | PHF1       | -0.0800396 |
| PCOLCE2   | 68.6 | 2.42E-07   | PCOLCE2    | -0.0915511 |
|           |      |            | TRIOBP     | -0.1041091 |
| NFKB2     | 14.1 | 0.0000307  | NFKB2      | -0.106006  |
| DHODH     | 19.2 | 0.00000215 | DHODH      | -0.1135122 |
|           |      |            | SMURF1     | -0.1173384 |
| C20orf27  | 31.4 | 0.0000105  | C20orf27   | -0.1258522 |
|           |      |            | UBIAD1     | -0.1263049 |
| HIST1H2AC | 10.1 | 0.0000471  | HIST1H2AC  | -0.1292683 |
|           |      |            | NOP2       | -0.1371924 |
| GNL3      | 46.8 | 6.94E-10   | GNL3       | -0.141168  |
| ANAPC1    | 79.4 | 0.00000013 | ANAPC1     | -0.1458803 |
|           |      |            | DGKA       | -0.1467746 |
| MKNK1     | 16.3 | 8.12E-08   | MKNK1      | -0.1482671 |
|           |      |            | FLAD1      | -0.1488159 |
|           |      |            | NCL        | -0.1499703 |
|           |      |            | CYTH2      | -0.1560945 |
| IPO4      | 26.8 | 0.00000122 | IPO4       | -0.1600126 |
|           |      |            | DTX2P1-UPK | -0.1665641 |
|           |      |            | FAM86B1    | -0.1679319 |
|           |      |            | IRF9       | -0.1729224 |
| BEND3     | 19.9 | 0.0000169  | BEND3      | -0.1746758 |
|           |      |            | LAMC2      | -0.1766592 |
| DDX10     | 18.4 | 0.00000177 | DDX10      | -0.1821618 |
|           |      |            | RABEPK     | -0.2034943 |
|           |      |            | LTBP2      | -0.2045854 |
|           |      |            | ALDH1B1    | -0.2157447 |
|           |      |            | PCYOX1L    | -0.2239512 |
| GEMIN5    | 37.9 | 3.23E-07   | GEMIN5     | -0.2240536 |
|           |      |            | GOLGA2     | -0.2249011 |
|           |      |            | MYBBP1A    | -0.2293209 |
|           |      |            | ABL2       | -0.2350513 |
|           |      |            | AKAP12     | -0.2439398 |
|           |      |            | SNHG1      | -0.244615  |
|           |      |            | C10orf2    | -0.2457802 |
|           |      |            | NOL6       | -0.2483121 |
|           |      |            | PC         | -0.2497506 |
|           |      |            | XPO5       | -0.2590166 |
|           |      |            | SLC6A8     | -0.2638752 |
| PMM2      | 64.5 | 8.45E-08   | PMM2       | -0.2703994 |
|           |      |            | PRR5       | -0.278676  |
|           |      |            | TMEM97     | -0.2841201 |
|           |      |            | TCOF1      | -0.2847079 |
| TRMT1     | 67.4 | 4.33E-09   | TRMT1      | -0.2962588 |
| NGFR      | 11.7 | 2.86E-07   | NGFR       | -0.298941  |
| SLC19A1   | 73.3 | 8.34E-18   | SLC19A1    | -0.3010219 |
|           |      |            | DIEXF      | -0.301911  |
| MRTO4     | 39.6 | 0.0000344  | MRTO4      | -0.3073185 |
|           |      |            | RCL1       | -0.3079154 |
|           |      |            | NPM1       | -0.3119431 |
|           |      |            | NLE1       | -0.3150459 |
|           |      |            | VMP1       | -0.3219638 |
| RNF213    | 53.4 | 4.49E-07   | RNF213     | -0.3275501 |
| SFXN4     | 34.6 | 5.84E-07   | SFXN4      | -0.334503  |
|           |      |            | NOP56      | -0.3378809 |
|           |      |            | ALG3       | -0.3451605 |
| DDX18     | 48.7 | 7.96E-12   | DDX18      | -0.3482528 |
|           |      |            | CIRH1A     | -0.3586847 |
| WDR74     | 41.2 | 6.95E-08   | WDR74      | -0.3678916 |
|           |      |            | MON1A      | -0.3701441 |
|           |      |            | NOLC1      | -0.3739274 |
|           |      |            | NOP16      | -0.3746264 |
|           |      |            | MST1R      | -0.3750348 |

Supplemental Table 4

|         |      |            |            |            |
|---------|------|------------|------------|------------|
|         |      |            | PNPT1      | -0.3765575 |
|         |      |            | ATIC       | -0.3781503 |
| TLL12   | 22.9 | 8.45E-08   | TLL12      | -0.3861055 |
|         |      |            | RPP40      | -0.3871235 |
|         |      |            | C12orf66   | -0.3925404 |
|         |      |            | PHB        | -0.3943042 |
|         |      |            | DUOX1      | -0.3959701 |
|         |      |            | TFB2M      | -0.4043133 |
|         |      |            | NUFIP1     | -0.4068848 |
|         |      |            | GPATCH4    | -0.4125611 |
|         |      |            | UTP20      | -0.4138331 |
|         |      |            | PTRH2      | -0.4160032 |
|         |      |            | AIMP2      | -0.4237867 |
| SUPV3L1 | 47.4 | 2.85E-11   | SUPV3L1    | -0.4377927 |
|         |      |            | DDX28      | -0.454518  |
|         |      |            | SRM        | -0.4790887 |
|         |      |            | METTL1     | -0.4848551 |
| HSPD1   | 90.7 | 1.15E-09   | HSPD1      | -0.5235918 |
|         |      |            | PES1       | -0.5275139 |
|         |      |            | CCDC137    | -0.5416324 |
| LSG1    | 38.5 | 0.0000121  | LSG1       | -0.5447041 |
|         |      |            | RRP9       | -0.551995  |
|         |      |            | FAM86C1    | -0.5544374 |
|         |      |            | UTP14A     | -0.5776743 |
|         |      |            | ACSS2      | -0.5812648 |
| SCFD2   | 56.6 | 3.43E-16   | SCFD2      | -0.5833923 |
|         |      |            | GPRCSA     | -0.6296328 |
| OSBP2   | 14.4 | 5.68E-07   | OSBP2      | -0.6362156 |
| PLD6    | 30   | 2.15E-08   | PLD6       | -0.6870087 |
| DUSP2   | 18.4 | 8.9E-14    | DUSP2      | -0.7141919 |
| CCDC86  | 50.8 | 0.00000649 | CCDC86     | -0.7306606 |
|         |      |            | RUNX1      | -0.7387441 |
|         |      |            | ZBED2      | -0.7448414 |
|         |      |            | BID        | -0.7757013 |
|         |      |            | ADAM8      | -0.9890124 |
|         |      |            | SERPINB1   | -1.5839201 |
|         |      |            | ERVMER34-1 | -1.8412986 |
|         |      |            | HSPA6      | -2.3025572 |
